# Supplementary material
Source: Springer Nature journal article supplement (https://www.springermedizin.de/resource/supplementary/12889_2013_6376_MOESM2_ESM.pdf/9497160)
Supplement: MOESM2 [file 9497160]

## Additional file 2. Detailed description of the generic self-reported instruments measuring health-related productivity changes

| Instrument                                                               | Construct / Content                                                                                                                                                 | # questions / items                                                                                           | Rating                                                                                                                                                           | Item example                                                                                                                                                                                     | Recall period                   | Discipline      |
|--------------------------------------------------------------------------|---------------------------------------------------------------------------------------------------------------------------------------------------------------------|---------------------------------------------------------------------------------------------------------------|------------------------------------------------------------------------------------------------------------------------------------------------------------------|--------------------------------------------------------------------------------------------------------------------------------------------------------------------------------------------------|---------------------------------|-----------------|
| Work Limitations Questionnaire (WLQ) (18, 20, 26, 27, 35, 36, 41, 43)    | Degree to which health problems interfere with specific aspects of job performance and its productivity impact                                                      | 16 or 25<br>4 dimensions: physical demands, time management, output demands, and mental/interpersonal demands | 5-point scale from none of the time (0%) to all of the time (100%)                                                                                               | "In the past two weeks, how much of the time did your physical health or emotional problems make it difficult for you to stick to a routine or schedule?"                                        | 2 to 4 weeks                    | Medical         |
| Endicott Work Productivity Scale (EWPS) (18, 28)                         | Wide variety of mental and medical disorders working in a wide variety of job settings to assess the degree to which this affects the work functioning of a subject | 25                                                                                                            | 5-point scale of how often the behaviour or feeling, or attitude has been manifested during the past week: 0 (best possible score) to 100 (worst possible score) | "During the past week, how frequently did you find you have forgotten to call someone?"                                                                                                          | 7 days                          | Medical         |
| Work Productivity and Activity Impairment Instrument (WPAI) (18, 21, 38) | The effect of general health and symptom severity on work productivity and regular activities                                                                       | 6                                                                                                             | 5-point scale of how severity of symptoms interfere with performance: 0 ('very severe') to 5 ('did not have symptom')                                            | "Are you currently employed (working for pay)?"                                                                                                                                                  | 7 days                          | Economics       |
| Work Productivity Short Inventory (WPSI) (18, 20, 30)                    | The prevalence of medical problems that may influence work productivity and the financial implications thereof                                                      | 22                                                                                                            | Open questions                                                                                                                                                   | "During the past year, did you experience an anxiety disorder, such as Generalized Anxiety Disorder, Panic Disorder, Phobias, Obsessive Compulsive Disorder, or Post-traumatic Stress Disorder?" | 2 weeks,<br>3 months,<br>1 year | Social sciences |
| American Medical Association-Guides (AMA-guide) (29)                     | The loss of function and determination of compensation and ability to work after injury or illness                                                                  | 15                                                                                                            | 10-point scale how pain now affects functioning in everyday activities: 0 ('work normally') to 10 ('unable to work at all')                                      | "Does your pain interfere with your normal work inside and outside the home?"                                                                                                                    | Now                             | Medical         |

|                                                                                        |                                                                                                                                       |                                                                                                                                                                                                                                                         |                                                                                                                       |                                                                                                                                                                                                                                                                                                                                                       |                                     |                                                       |
|----------------------------------------------------------------------------------------|---------------------------------------------------------------------------------------------------------------------------------------|---------------------------------------------------------------------------------------------------------------------------------------------------------------------------------------------------------------------------------------------------------|-----------------------------------------------------------------------------------------------------------------------|-------------------------------------------------------------------------------------------------------------------------------------------------------------------------------------------------------------------------------------------------------------------------------------------------------------------------------------------------------|-------------------------------------|-------------------------------------------------------|
| World Health Organization Health and work Performance Questionnaire (WHO HPQ) (31, 32) | Indirect workplace costs of illness by assessing absenteeism, presenteeism, and critical incidents                                    | 3 categories:<br>Health (31 items)<br>Work (16 items)<br>Demographics (8 items)                                                                                                                                                                         | Open questions                                                                                                        | "Now please think of your work experiences over the past 4 weeks (28 days). In the spaces provided below, write the number of days you spent in each of the following work situations. In the past 4 weeks (28 days), how many days did you miss an entire work day because of problems with your physical or mental health? Number of days (00-28)." | Four week period or the past 7 days | Social sciences (occupational environmental medicine) |
| Stanford Presenteeism Scale (SPS) (33, 40)                                             | The impact of health problems on individual performance and productivity                                                              | 6 statements reflecting cognitive, emotional and behavioural aspects                                                                                                                                                                                    | Five-point scale from 1 (if you strongly disagree with the statement) to 5 (if you strongly agree with the statement) | "Statement: 'because of my health problem, the stresses of my job were much harder to handle'."                                                                                                                                                                                                                                                       | 30 days                             | Social sciences (occupational environmental medicine) |
| The PROductivity and DISease Questionnaire (PRODISQ) (23)                              | Productivity costs by assessing the relationship between health and productivity                                                      | 7 modules<br>64 questions:<br>General information (N=4), Profession, working situation and income (N=16), Absenteeism (N=4), Compensation mechanisms (N=5), Presenteeism (N=3), Organizational level (N=17), Administrative and management costs (N=15) | Open questions<br>Multiple-choice                                                                                     | "On the scale below, please circle how much work you've done during your last day in your normal working hours compared to a normal working day '0' (nothing) to '10' (as much as normal)."                                                                                                                                                           | 3 months                            | Economics                                             |
| Health-Related Productivity Questionnaire Diary (HRPQ-D) (34)                          | Work productivity data within clinical trials and survey data collections: data relating to health-related labour force participation | 9                                                                                                                                                                                                                                                       | Open questions<br>Multiple-choice                                                                                     | "Hours of work outside the home missed because of 'the health problem': record the number of hours you work you missed today because of 'the health problem'. If none, put a zero here."                                                                                                                                                              | Daily                               | Social sciences (occupational environmental medicine) |
| Health and Labour Questionnaire (HLQ) (19, 24)                                         | Relationship between illness and treatment and work performance: estimate the                                                         | 4 modules:<br>Absence from paid work, Reduced productivity at                                                                                                                                                                                           | 4-point scale from (almost) never to (almost) always                                                                  | "I did go to work but as a result of health problems. I had a problem                                                                                                                                                                                                                                                                                 | 2 weeks                             | Economics                                             |

|                                                     |                                                                                                                                                  |                                                                                                                                                                                                                                                                                                                                              |                                                                                                                                                                                            |                                                                                                                                                                                           |                  |                 |
|-----------------------------------------------------|--------------------------------------------------------------------------------------------------------------------------------------------------|----------------------------------------------------------------------------------------------------------------------------------------------------------------------------------------------------------------------------------------------------------------------------------------------------------------------------------------------|--------------------------------------------------------------------------------------------------------------------------------------------------------------------------------------------|-------------------------------------------------------------------------------------------------------------------------------------------------------------------------------------------|------------------|-----------------|
|                                                     | production losses (costs) and the ability to use work as an indicator of health status in the social domain                                      | paid work, Unpaid production, and Impediments to paid and unpaid labour                                                                                                                                                                                                                                                                      |                                                                                                                                                                                            | concentrating."                                                                                                                                                                           |                  |                 |
| Quality & Quantity Questionnaire (Q&Q) (19)         | Quantity and quality of the work performed on the last working day                                                                               | 2                                                                                                                                                                                                                                                                                                                                            | 10-point scale from 0 (practically nothing and very poor quality) to 10 (normal quantity and normal quality)                                                                               | "Could you indicate how much work you actually performed today during regular hours as compared to normal on the scale below?"                                                            | Last working day | Economics       |
| Well-Being Assessment for Productivity (WBA-P) (37) | Informative evaluation of job performance loss due to well-being related barriers                                                                | 12 common barriers to productivity                                                                                                                                                                                                                                                                                                           | Individual's ability to perform his or her best at work (not at all, some, or a lot)<br>Work-related and personal barriers (scoring from 0 'not at all' to 100 'a lot for all 11 reasons') | "How often have you had trouble at work concentrating or doing you best because of ...? (each of the 11 items)"                                                                           | 4 weeks          | Social sciences |
| Health and Work Questionnaire (HWQ) (39)            | Workplace productivity and worker health                                                                                                         | 24                                                                                                                                                                                                                                                                                                                                           | Multi-part questions on a 10 point-scale                                                                                                                                                   | "How satisfied were you overall with your job this week?"                                                                                                                                 | 7 days           | Social sciences |
| Work and Health Interview (WHI) (42)                | Captures data on absence time from work and related causes and on health-related reduced performance while at work and the health-related causes | Six module interview (first 3 obtain verbal informed consent, detailed data on employment status and usual work time, and data on episodes of 21 health problems; then a job visualization module, questions about health problems reported as the cause of missed work or reduced productivity, and data on demographics and annual salary) | Computer-assisted telephone interview (open questions and categorical response options (percentages))                                                                                      | Primes respondents to report on health-related lost productive time on days at work; asks detailed questions about usual tasks and activities performed at work and time allotted to each | 2 weeks          | Economics       |

|                                                          |                                                                                                  |                                                                                                                                         |                                    |                                                                                                                                                          |        |                 |
|----------------------------------------------------------|--------------------------------------------------------------------------------------------------|-----------------------------------------------------------------------------------------------------------------------------------------|------------------------------------|----------------------------------------------------------------------------------------------------------------------------------------------------------|--------|-----------------|
| Valuation of Lost Productivity questionnaire (VOLP) (22) | Assess labour input loss due to health (any physical, mental, or emotional problems or symptoms) | 36 questions in 6 sections: employment status, job characteristics, absenteeism, work performance, unpaid work, and working environment | Open questions and multiple-choice | "Which of the following describes your current work situation? 1. Working full time as an employee 2. Working part time as an employee 3. Self-employed" | 7 days | Social sciences |
|----------------------------------------------------------|--------------------------------------------------------------------------------------------------|-----------------------------------------------------------------------------------------------------------------------------------------|------------------------------------|----------------------------------------------------------------------------------------------------------------------------------------------------------|--------|-----------------|
